1 **Aging associated altered response to intracellular bacterial infections**  
2 **and its implication on the host**

3 **Running title:** Bacterial infection in aged

4 Sheryl E. Fernandes<sup>1</sup>, Alakesh Singh<sup>2</sup>, R.S. Rajmani<sup>3</sup>, Siddharth Jhunjunwala<sup>2</sup>, Deepak K. Saini<sup>1,2,3\*</sup>

5 <sup>1</sup>Department of Molecular Reproduction, Development and Genetics, Indian Institute of Science,  
6 Bangalore-560012, India.

7 <sup>2</sup>Center For BioSystems Science and Engineering, Indian Institute of Science, Bangalore-560012,  
8 India.

9 <sup>3</sup>Center for Infectious Disease Research, Indian Institute of Science, Bangalore-560012, India.

10

11 **Corresponding author:** \*Deepak K. Saini

12 Tel: 91-80-22932574; **Email:** [deepaksaini@iisc.ac.in](mailto:deepaksaini@iisc.ac.in)

13

14 **Keywords** – Aging ; infection; Salmonella; Tuberculosis; nitric oxide; NSAID

15

## 16 **Summary statement**

17 Using cellular models and old mice we demonstrate the effect of aging on host response to bacterial  
18 infections. Aged systems mount a more effective anti-bacterial innate immune response but its  
19 persistence results in mortality of the host.

## 20 **Abstract**

21 The effects of senescence and aging on geriatric diseases has been well explored but how these  
22 influence infections in the elderly have been scarcely addressed. Here, we show that several innate  
23 immune responses are elevated in senescent cells and old mice, allowing them to promptly respond to  
24 bacterial infections. We have identified higher levels of iNOS as a crucial host response and show that  
25 p38 MAPK in senescent cells acts as a negative regulator of iNOS transcription. In old mice, however  
26 the ability to impede bacterial proliferation does not correlate with increased survival as elevated  
27 immune responses persist unabated eventually affecting the host. The use of anti-inflammatory drugs  
28 that could consequently be recommended also decreases iNOS disarming the host of a critical innate  
29 immune response. Overall, our study highlights that infection associated mortality in the elderly is not  
30 merely an outcome of pathogen load but is also influenced by the host's ability to resolve inflammation  
31 induced damage.

## 32 **Introduction**

33 Organismal aging is defined as a gradual loss in physiological function and homeostasis (Flatt, 2012)  
34 which predisposes the elderly to several diseases. In 1881, the evolutionary biologist A. Weissman  
35 proposed that the functional decline associated with aging was likely to be a result of the finite capacity  
36 of cells in the body to divide (Childs *et al.*, 2017). This remained a theory till much later when Leonard  
37 Hayflick for the first time demonstrated that indeed, cells from the body can divide only a finite number  
38 of times before reaching a non-dividing state (Hayflick and Moorhead, 1961; Hayflick, 1965), which

39 is now referred to as cellular senescence. Several studies since then have shown that senescent cells  
40 accumulate in several tissues with age (Dimri *et al.*, 1995; Jeyapalan *et al.*, 2007) and their targeted  
41 removal not only increases lifespan but also ameliorates common aging associated pathologies (Baker  
42 *et al.*, 2011; Campisi and Deursen, 2016; Jeon *et al.*, 2017).

43 Numerous mechanisms are known to trigger senescence of cells in the body like telomere attrition,  
44 DNA damage and oxidative stress due to mitochondrial dysfunction (Ben-Porath and Weinberg, 2005;  
45 Hernandez-segura, Nehme and Demaria, 2018). However, despite the multiple triggers, the eventual  
46 outcome is a persistent DNA damage response (DDR) that activates cell cycle inhibitors and initiates  
47 senescence (Rossiello *et al.*, 2014; Salama *et al.*, 2014). Therefore, genotoxic agents (e.g. Ionizing  
48 radiation, BrdU and Doxorubicin) are popularly used to induce and study senescence *in vitro* (Chen,  
49 Ozanne and Hales, 2007; Petrova *et al.*, 2016; Wang, Boerma and Zhou, 2016).

50 After committing to this state of permanent cell cycle arrest, many cellular changes occur altering the  
51 signalling landscape resulting in cells which are phenotypically distinct from their non-senescent  
52 counterparts (Salama *et al.*, 2014). The secretome of senescent cells, referred to as senescence  
53 associated secretory phenotype (SASP) consists of a variety of growth factors, cytokines and  
54 chemokines. SASP has been linked to a plethora of geriatric metabolic and degenerative disorders  
55 (Baker *et al.*, 2011; Childs *et al.*, 2017), however, senescence and its implication on infection has not  
56 yet been well studied.

57 Old individuals do not respond similarly to young infected ones clearly indicating that an aged system  
58 perceives pathogens differently. Instead of expected clinical symptoms like fever, atypical symptoms  
59 like nausea or weight loss are observed making diagnosis challenging as the symptoms are often  
60 attributed to other age-related co-morbidities (Byng-Maddick and Noursadeghi, 2016). Therefore,  
61 understanding the interplay between aging and infection at cellular and organismal level becomes  
62 important.

63 In this study, we induce senescence in an established epithelial cell model of infection to understand  
64 the impact of aging on infection of a well-studied intracellular pathogen, *Salmonella* Typhimurium.  
65 Epithelial cells are important targets for intracellular pathogens and play a crucial role in deciding  
66 pathogenesis and prognosis of disease. However, their critical immune function in pathogen defense  
67 is only beginning to be understood (Krausgruber *et al.*, 2020).

68 Here, we show that senescent epithelial cells are better at inhibiting intracellular bacterial proliferation  
69 and investigation of anti-pathogen cellular mechanisms reveal that innate immune responses in  
70 senescent cells are significantly up regulated compared to non-senescent cells. With the help of  
71 molecular inhibitors, we identify elevated levels of Nitric oxide (NO) as the most important modulator  
72 of infection and show that p38 MAPK in senescent cells acts as a negative regulator of NO. Later, *in-*  
73 *vivo* studies of infection in naturally aged BALB/c mice shed light on how simultaneous senescence  
74 in multiple organ systems affect pathogen dissemination and infection. We also report lesser bacterial  
75 burden in old mice compared to young mice but interestingly no significant differences in lethality.  
76 This we demonstrate is an outcome of old mice limiting bacterial infection more competently due to a  
77 higher nitrosative response but an inability to upregulate host protective responses to infection induced  
78 inflammation. Consequently, the use of anti-inflammatory drugs maybe advocated, which also helps  
79 to reduce disease severity of co-morbidities driven by SASP (Crofford, 2013). However, we show that  
80 several clinically approved and over-the-counter (OTC) anti-inflammatory drugs may also perturb  
81 innate immune responses of senescent cells therefore restricting their usefulness during infection.

82 Our findings are finally validated in an another model of *Mycobacterium tuberculosis* infection of  
83 senescent lung epithelial cells and aged mice to overcome the concerns of a cell line or pathogen  
84 specific observation and eventually reveal a novel advantage and alternate function of accumulated  
85 senescent cells in the elderly.

86

## 87 **Results**

88 **Bacterial proliferation in senescent cells is reduced compared to non-senescent cells.** HeLa is  
89 widely accepted as an Epithelial cell model system for *Salmonella* infection and many fundamental  
90 virulence associated studies have been done using these cells (Hannemann, Gao and Gala, 2013;  
91 Bowden *et al.*, 2014; Alvarez *et al.*, 2017; Aguilar *et al.*, 2020). Therefore, we adopted HeLa as the  
92 cellular model for our study. We used BrdU, a genotoxic agent, to induce DNA damage and to mimic  
93 persistent DDR triggered cellular senescence *in vitro*. BrdU mediated senescence has been previously  
94 used to explore senescence associated changes by various groups including for HeLa cells (Masterson  
95 and Dea, 2007; Lim *et al.*, 2010; Nair, Bagheri and Saini, 2014). Importantly, BrdU is incorporated  
96 specifically into the DNA thereby avoiding uncharacterized non-specific effects of other genotoxic  
97 agents like Doxorubicin or ionizing radiation (IR) which can also generate free radicals that can oxidize  
98 and perturb protein and lipid homeostasis affecting infection directly (Thorn *et al.*, 2011; Reisz *et al.*,  
99 2014). All these factors made BrdU induced senescence an ideal method to study downstream effects  
100 of senescence on infection.

101 Senescence in BrdU treated HeLa cells was confirmed by Senescence-Associated  $\beta$ -galactosidase (SA  
102  $\beta$ -gal) staining (Fig 1A), a well-accepted physiological marker (Dimri *et al.*, 1995). Other senescence  
103 associated molecular markers like increase in the expression of p21/ *CDKN1A*, a cell cycle inhibitor  
104 and phosphorylation of Chk2, a signalling protein in the DNA damage detection cascade (Chen, Hales  
105 and Ozanne, 2007) were also confirmed in the treated cells (Supplementary Fig. S1A and S1B).

106 Once the cellular senescence model was validated, to investigate if bacterial invasion and survival  
107 varies between non-senescent (NS) and senescent (S) cells, equal numbers of NS and S HeLa cells  
108 were infected with *Salmonella* Typhimurium NCTC 12023 for 30 minutes and 60 minutes. There was  
109 no difference in bacterial invasion determined through colony forming units (CFU) on *Salmonella*  
110 *Shigella* (SS) agar (Fig 1B). Further, to compare bacterial proliferation and survival in NS and S cells,

111 *Salmonella* were allowed to invade host cells for 60 minutes (invasion), after which extracellular  
112 bacteria were removed by Gentamicin treatment. Viable intracellular bacteria were then enumerated  
113 in terms of CFU immediately at invasion (indicated as 0h post invasion in Fig 1C) and at 3h, 6h and  
114 16h post invasion. At 3h, there was no significant difference in CFU, however, at 6h and 16h, S cells  
115 harboured significantly lesser number of bacteria compared to NS cells (Fig 1C), indicating that while  
116 cellular senescence does not affect invasion, it impairs bacterial survival and proliferation. The CFU  
117 data was corroborated with fluorescence imaging of GFP-HeLa cells infected with *Salmonella*  
118 constitutively expressing mCherry (Fig S2). At 16h post invasion, lesser bacterial numbers could be  
119 visualized in S cells compared to NS cells. Additionally, a similar reduction in *Salmonella* proliferation  
120 was observed in BrdU induced senescent HepG2 hepatocyte cells compared to non-senescent HepG2  
121 cells (Fig S3) indicating that the effect of senescence on *Salmonella* proliferation was consistent across  
122 cell lines.

123 Previously it has been shown that intracellular localization of *Salmonella* can influence bacterial  
124 proliferation. Loss in integrity of *Salmonella* containing vacuoles (SCVs) results in their entry into the  
125 cytoplasm; and these bacteria proliferate faster than those contained within SCVs (Brumell *et al.*,  
126 2002). Having observed lesser bacteria in S cells, we investigated if bacteria were able to escape into  
127 the cytosol of NS cells but were restricted to vacuoles in S cells. For this, we determined percent  
128 vacuolar and cytosolic bacteria using a well-established Chloroquine assay (Knodler, Nair and Steele-  
129 mortimer, 2014). No significant difference in percent cytosolic bacteria was observed at both early  
130 (3h) and late (16h) time points of infection and bacteria were found to be majorly vacuolar in both NS  
131 and S cells (Fig 1D). This suggested that the difference in CFU is not due to their intracellular  
132 localization but due to some other factor intrinsic to senescent cells.

133 **Many antimicrobial factors are altered in senescent cells.** Since S cells showed significantly lower  
134 bacterial proliferation (Fig 1C), we hypothesized that antimicrobial factors maybe up regulated in these

135 cells. Given that free radicals (ROS and RNS) and anti-microbial peptides are primary intracellular  
136 anti-microbial factors, we analysed if these are altered in senescent cells. It has been previously  
137 observed that Reactive Oxygen Species (ROS) levels are elevated during senescence and is critical for  
138 maintenance of cell viability (Nair, Bagheri and Saini, 2014). Here also we recorded enhanced ROS  
139 levels, measured by Dichlorofluorescein diacetate (DCFDA) fluorescence and lipofuscin staining  
140 (Figs 2A and 2B). We also observed enhanced levels of another free radical species, Nitric oxide (NO),  
141 by Griess assay in S cells compared to NS cells (Fig 2C). NO production is majorly regulated by the  
142 transcript levels of *NOS2* which encodes the enzyme inducible Nitric Oxide Synthase (iNOS) that  
143 converts L-Arginine to Citrulline, and NO (Aktan, 2004). Gene expression analysis confirmed that  
144 *NOS2* was also up regulated in S cells (Fig 2D). It is known that both nitrosative and oxidative free  
145 radicals compromise bacterial infection (Umezawa *et al.*, 1997; Henard and Vázquez-Torres, 2011;  
146 Gogoi, Shreenivas and Chakravorty, 2019).

147 We also estimated the levels of secreted IL-8 from NS and S cells after infection. IL-8 is a pro-  
148 inflammatory cytokine and is one of the components of the senescence associated secretory phenotype  
149 (SASP) (Coppé *et al.*, 2010). Epithelial cell secreted IL-8 also acts as a chemokine for immune cell  
150 recruitment to the site of bacterial infection (Eckmann, Kagnoff and Fierer, 1993; McCormick *et al.*,  
151 1993) and hence is critical to both senescence and infection. As expected, IL-8 levels were significantly  
152 elevated in S cell secretome compared to NS cells (Fig 2E). As early as 16h after infection, IL-8  
153 induction was observed in S cells but not NS cells (Fig 2E) indicating higher potential of senescent  
154 cells to initiate immune cell recruitment to enhance bacterial clearance.

155 Additionally, analysis of an unbiased microarray of NS and S HeLa transcripts reported earlier (Nair,  
156 Madiwale and Saini, 2018) suggested that the levels of cationic antimicrobial peptides (CAMPs) are  
157 also altered in senescent cells (Fig 2F). We were particularly interested in the levels of Cathelicidins  
158 (LL37) and  $\beta$ -defensins 1 and 2, since it has been previously reported that mice deficient for these

159 CAMPs are susceptible to bacterial infections (Rosenberger, Gallo and Finlay, 2004; Semple and  
160 Dorin, 2012). Validation of the microarray data showed that indeed, LL37 and  $\beta$ -defensin 1 were also  
161 significantly up-regulated in S cells (Fig 2G), in addition to ROS and NO, however, we could not  
162 detect levels of  $\beta$ -defensin 2 in NS or S cells.

163 **Nitric oxide (NO) is the major regulator of infection in senescent cells and is negatively regulated**  
164 **by p38 MAPK.** Compared to all other antimicrobial mechanisms, change in free radical levels in  
165 senescent cells was the most prominent and hence we decided to probe whether ROS and/or NO were  
166 important to restrict bacterial proliferation in senescent cells. For this, infections were carried out in  
167 the presence of N-acetylcysteine (NAC), a ROS quencher or Aminoguanidine (AMG), a selective  
168 inhibitor of iNOS. In the presence of the compounds, bacterial proliferation in S cells increased,  
169 however it was significantly higher in AMG treated senescent cells (Fig 3A). We further confirmed  
170 that the inhibitors did not have a direct effect at the concentrations used on *Salmonella* growth *per se*  
171 by growing the bacterium in Luria Bertani broth containing increasing concentrations of the  
172 compounds, followed by an Alamar Blue assay to assess bacterial viability. AMG did not have any  
173 direct effect at concentrations up to 1mM, however, NAC at 20 $\mu$ M drastically reduced bacterial  
174 viability (Fig S4) indicating a direct effect on bacterial survival. Although AMG has been extensively  
175 used as an inhibitor to iNOS, which was also confirmed by us (Fig S5A), we wanted to ensure that  
176 treatment of senescent cells with AMG does not perturb expression of other infection modulators such  
177 as anti-microbial peptides. Towards this, gene expression of the peptides, LL37 and  $\beta$ -defensin1 was  
178 analyzed in senescent cells after AMG treatment. Neither LL37 nor  $\beta$ -defensin 1 transcript levels  
179 changed (Fig S5B), demonstrating that inhibition of iNOS alone was enough to increase bacterial  
180 infection in senescent cells and CAMPs may not contribute significantly towards restricting bacterial  
181 proliferation. This highlights the importance of elevated iNOS/ NO levels in senescent cells as a major  
182 anti-bacterial factor.



183 Given that NO significantly affects infection in senescent cells, we wanted to identify molecular  
184 regulators of iNOS in S cells that could affect bacterial proliferation by modulating NO levels. Since  
185 NO (Fig 2C and 2D) and inflammation (Fig 2E) are significantly higher in senescent cells, we decided  
186 to investigate the role of p38 MAPK, a well-known regulator of both inflammation and iNOS (Bhat  
187 *et al.*, 2002; Cuenda and Rousseau, 2007; Freund, Patil and Campisi, 2011) in infected senescent cells.  
188 For this, senescent cells were pre-treated with SB-202190 (SB), a specific inhibitor of activated  
189 p38MAPK for 4 hours and then infection was carried out in the presence of the inhibitor. We found  
190 that bacterial proliferation was further compromised in the presence of SB- 202190 (Fig 3B) without  
191 the inhibitor having a direct effect on bacterial viability (Fig S6) indicating that p38 MAPK inhibition  
192 in S cells was modulating a host anti-microbial response. Western blot for phosphorylated Hsp27  
193 levels, a substrate of phospho-p38MAPK confirmed inhibitor activity of SB- 202190 in S cells (Fig  
194 3C). We also see that in vehicle treated senescent cells, immediately at 1h post infection, p38MAPK  
195 signaling is activated and later at 16h post infection it returns to basal levels (Fig 3C). As expected, no  
196 activation of Hsp27 was detected when infection was carried out in the presence of SB-202190.

197 Since the bacterial load was reduced in p38MAPK inhibited cells and from our previous findings we  
198 know that NO is a major determinant of infection, we estimated the NO levels in SB-202190 treated  
199 senescent cells using Griess assay. Indeed, NO was significantly higher in inhibitor treated cells  
200 compared to the vehicle control (Fig 3D). To further understand if transcription of iNOS was also  
201 affected, qRT-PCR was performed for its gene expression changes and we found that p38 MAPK  
202 inhibition also increased *NOS2* transcript levels (Fig 3E). When the effect of p38 MAPK inhibition on  
203 NS cells was investigated, neither infection nor NO levels were affected when NS cells were treated  
204 with SB202190 (Fig S7). Together, this indicates that p38 MAPK is a negative regulator of iNOS and  
205 therefore NO specifically in senescent cells.

206 To further validate that the effect on infection observed after SB 202190 treatment in senescent cells  
207 was indeed via up-regulation of iNOS, S cells were infected after co-treatment with AMG and SB  
208 202190. As expected, treatment with SB 202190 alone decreased infection and AMG alone increased  
209 infection (Fig 3F). When both the inhibitors were used, the bacterial load was comparable to AMG  
210 treated cells (Fig 3F) and the decrease observed after SB202190 treatment was reversed. This  
211 ascertains that p38MAPK inhibition reduces infection by increasing nitrosative response of the host  
212 cell.

213 **Aged mice also show higher iNOS expression and reduced bacterial burden compared to young**  
214 **mice.** It is already demonstrated that senescent cells accumulate in several tissues of old mice (Wang  
215 *et al.*, 2009) and our cellular infection studies demonstrate that senescent cells significantly suppress  
216 intracellular bacterial proliferation with iNOS playing a pivotal role. Hence, to test this *in vivo*,  
217 naturally aged, male BALB/c mice (18 months old) were orally infected with *S. Typhimurium* and  
218 bacterial load in the liver and spleen, the major sites of stable bacterial colonization (Watson and  
219 Holden, 2010) was examined and compared to infected young mice (2 months old). Concurrent with  
220 our *in cellulo* findings, old mice had significantly lower bacterial load in the liver and spleen (Fig 4A).  
221 Analysis of Hematoxylin and Eosin (H&E) stained sections of the liver showed that there was  
222 recruitment of immune cells to the infected liver in both young and old mice, however, more hepatic  
223 tissue damage was seen in young infected mice (Fig 4B).

224 Based on the findings from our *in-vitro* infection studies, we compared the levels of *Nos2* between  
225 young and aged mice. In agreement with our findings from senescent cells, basal *Nos2* transcript levels  
226 were higher in the liver of old mice and infection caused a further increase to levels which were  
227 significantly higher compared to young infected mice (Fig 4C). This suggests that at both cellular and  
228 organismal level of aging, increased levels of iNOS plays a significant role in restricting bacterial  
229 infection. Additionally, as expected, an increase in *Tnfa*, *Il1β* and *IFNγ* pro-inflammatory cytokine

230 transcription was also observed on infection (Fig 4D-F). Since pro-inflammatory cytokines direct  
231 immune cell recruitment, we then compared the percentages of immune cells in the liver at basal level  
232 and after the mice were orally infected. We observed a significant increase in immune cells percentages  
233 in the liver of young mice after infection (Fig 4G). This corresponded with a significant increase in the  
234 percentage of monocytes and increases (but not statistically significant) in percentages of neutrophils  
235 and dendritic cells (Fig. S8B). We also observed a marginal increase in overall immune cell  
236 percentages in old mice (Fig 4G). This could be possibly due to higher bacterial burden in young mice  
237 creating the need for increased immune cell recruitment.

238 **Persistent inflammation compromises survival of aged mice despite lower bacterial burden.**

239 Nevertheless, when survival of mice after infection was compared by Kaplan Meier plot, old mice did  
240 not survive for a significantly longer time despite showing reduced infection (Fig 5A). This surprising  
241 observation prompted us to examine changes in the expression levels of Serine Protease Inhibitors  
242 (SERPIN) A1, B1 and B9 in the liver tissue. SERPINs are mostly known to have a protective function  
243 during chronic inflammation and an increase in their levels are correlated with resolution of  
244 inflammation induced damage to the host (Law *et al.*, 2006; Choi *et al.*, 2019; Kaner *et al.*, 2019;  
245 Rieder *et al.*, 2019). Significant downregulation of SERPINs A1 and B9 were seen in infected  
246 compared to uninfected young mice (Fig 5B and 5C) possibly to potentiate the immune response  
247 towards clearing the bacterial burden. We report a similar trend in the expression of SERPINs A1 and  
248 B9 in old mice (Fig 5B and 5C) after infection. Contrarily, SERPIN B1 levels were significantly up-  
249 regulated in young mice after infection (Fig 5D) suggesting that there is probably a balance maintained  
250 between inflammation and anti-inflammatory responses of the host to achieve clearance of pathogens  
251 while simultaneously preventing excessive damage due to the acute immune response to infection. In  
252 old mice, however, SERPIN B1 levels remained unaltered (Fig 5D) after infection indicating the lack  
253 of a protective response to infection induced inflammation. Additionally, gene expression analysis of

254 IL-10 a known anti-inflammatory cytokine also significantly increased in young mice after infection  
255 but in old mice the increase was only marginal (Fig 5E). This suggests that the inflammatory immune  
256 response in old mice is efficient in clearing the bacteria, however, its persistently elevated levels may  
257 cause continuous damage to host tissue, compromising host survival.

258 In fact, morbidity in the elderly is already associated with chronic inflammation and steroidal or non-  
259 steroidal anti-inflammatory drugs (NSAIDs) are commonly administered to decrease severity of  
260 several geriatric diseases (Crofford, 2013). Since our findings also reveal that inflammation can  
261 influence the survival of infected aged mice, we wanted to understand the implications of these drugs  
262 on infection in the aged. To address this, we examined effect of several common anti-inflammatory  
263 compounds viz. Diclofenac, Budesonide, Naproxen and Ibuprofen using the senescent cell model of  
264 *Salmonella* infection. We first confirmed the anti-inflammation properties of these compounds in  
265 senescent cells by analyzing the levels of secreted IL-8 after drug treatment. All the drugs except  
266 Ibuprofen were able to decrease IL-8 levels as expected (Fig 5F). However, drugs that decreased  
267 inflammation also significantly increased bacterial proliferation (Fig 5G). Having identified NO as a  
268 predominant regulator of infection, we quantified the expression of *NOS2* in the drug treated cells to  
269 find *NOS2* transcript levels significantly reduced in Diclofenac and Naproxen treated cells (Fig 5H).  
270 Increase in bacterial proliferation after Budesonide treatment was however not associated with *NOS2*  
271 suppression (Fig 5H). Thus, contrary to the expectation that NSAIDs by reducing inflammation can  
272 perhaps promote overall survival of the infected aged host, these drugs may worsen infection by  
273 compromising host anti-pathogenic responses. In support of our finding, a previous population based  
274 case-control study designed to examine the association between anti-inflammatory drugs and Non-  
275 Tuberculous Mycobacterial-Pulmonary Disorder (NTM-PD) concluded a significantly increased risk  
276 of NTM-PD in individuals being administered anti-inflammatory drugs (Brode *et al.*, 2017). This study

277 further emphasizes on the fact that administration of these drugs even as therapy for co-morbidities in  
278 the elderly may compromise important innate immune responses predisposing the elderly to infections.

279 **Aging associated reduction in bacterial load is also recapitulated in *Mycobacterium tuberculosis***  
280 **infection.** To confirm that the observed effect of aging on bacterial infection was not specific to  
281 *Salmonella*, senescent and non-senescent A549 lung epithelial cells were infected with another  
282 intracellular pathogen *Mycobacterium tuberculosis* H37Rv. Even in this model of infection,  
283 significantly lesser number of bacteria were observed at 48h post infection in senescent cells (Fig 6A).  
284 To further validate these findings at an organismal level, young and old mice were infected by  
285 aerosolization of H37Rv and bacterial burden in the lungs was determined on day 60 after infection.  
286 Similar to our observations with *Salmonella*, old mice carried significantly lesser *Mycobacteria* in their  
287 lungs compared to young mice (Fig 6B). To ensure no difference in initial bacterial loads existed  
288 between the two groups, 2 young and 2 old infected mice were sacrificed on day 1 post aerosol  
289 infection and whole lung homogenates were plated to enumerate infecting bacterial numbers. All the  
290 mice were found to be infected with  $\approx 100$  bacteria and no differences were observed between the  
291 groups (Fig S8). The lungs of young mice also showed a greater number of granulomatous lesions (Fig  
292 6C) and H&E staining of infected lung tissues revealed increased congestion and necrosis (Fig 6D)  
293 compared to old mice. The lung sections were also scored for severity of disease based on the number  
294 of granulomatous lesions, oedema and immune cell infiltration and young infected mice showed higher  
295 disease severity (Fig 6E) when compared to old infected mice. Therefore, in multiple host and  
296 intracellular bacterial pathogen models, it seems that senescence and aging reduces infection.

297

## 298 **Discussion**

299 Accumulation of senescent cells in various tissues of the body is the major driver of aging (Jeyapalan  
300 *et al.*, 2007) and is associated with several geriatric metabolic and degenerative disorders (Baker *et al.*,

2011; Campisi and Deursen, 2016; Jeon *et al.*, 2017) but there is a paucity of literature that focusses on how it may affect infections in the elderly. In a study by Shivshankar *et al.*, it has been reported that increase in the expression of the receptor K10, specific to keratinocytes and mucosal epithelial cells of the lungs increases adhesion of the extracellular pathogen *S.pneumoniae*, and could possibly be responsible for higher incidence of pneumonia seen in the elderly (Shivshankar *et al.*, 2011). Another study implicates age associated Monocyte dysfunction for the reduced anti-pneumococcal activity observed in the aged (Puchta *et al.*, 2016). Many other studies on bacterial infection have focussed on how changes in the immune system during ageing can influence infection. However, contradicting evidence regarding immune-senescence indicates the presence of other confounding factors (Esposito and Pennington, 1983; Cooper *et al.*, 1995; Pacheco *et al.*, 2013), which may decide the final outcome of infection in the aged.

In the present study, we have used both cellular and organismal models to elucidate the effect of aging on two intracellular bacteria *S.Typhimurium* and *Mycobacterium tuberculosis*. Lim *et al* have previously reported that invasion of *S.Typhimurium* is enhanced in senescent fibroblast cells compared to non-senescent fibroblasts, however they do not comment on bacterial proliferation or survival post invasion (Lim *et al.*, 2010). In contrast to their study, using established epithelial cell models as hosts, specifically HeLa for *Salmonella Typhimurium* and A549 for *Mycobacterium tuberculosis*, we show that the ability of bacteria to invade non-senescent or senescent epithelial cells does not vary in contrast to fibroblasts, but senescent cells significantly inhibit intracellular bacterial proliferation. Investigation of known antimicrobial factors that could contribute to this phenotype reveal that several antibacterial mechanisms like levels of free radicals and antimicrobial peptides are already elevated in senescent cells possibly allowing them to respond to invading bacteria more rapidly than non-senescent cells. However, of all the enhanced mechanisms, elevated levels of Nitric Oxide (NO) was found to play a pivotal role in limiting bacterial proliferation. Mechanistically, we demonstrate that p38 MAPK in

325 senescent cells keeps NO levels in check and its inhibition causes increase in the transcription of *NOS2*  
326 which encodes the enzyme inducible Nitric Oxide Synthase (iNOS) responsible for the production NO.  
327 Inhibition of p38 MAPK was able to increase NO to levels that could further reduce bacterial infection  
328 indicating a key role of p38 MAPK in regulating Nitric Oxide levels in senescent cells and thereby  
329 infection.

330 The relevance of our findings from cellular infection studies were also tested *in vivo* using naturally  
331 aged mice. Previously using the Streptomycin induced gastroenteritis mouse model, it was  
332 demonstrated that old mice had higher tissue colonization and morbidity compared to young mice (Ren  
333 *et al.*, 2009). However, Streptomycin induced colitis may also directly affect infection outcomes. From  
334 our infection studies, we see that old mice had significantly reduced bacterial burden in the lungs upon  
335 aerosol infection with *M.tuberculosis* or in the liver and spleen when orally infected with  
336 *S.Typhimurium*. Importantly, iNOS transcript levels were higher in liver tissue of old animals and was  
337 further increased upon infection, thus re-enforcing our conclusions from *in vitro* infection experiments  
338 that elevated levels of NO during aging may play an important role in modulating infection.

339 Despite the lower bacterial infection, survival of old mice did not significantly vary from young mice,  
340 possibly because mortality is a cumulative outcome of the host's ability to fight the pathogen while  
341 simultaneously protecting itself from inflammation induced tissue damage. Here we show that infected  
342 old mice mount significant anti-pathogen responses including increase in pro-inflammatory cytokines  
343 TNF $\alpha$ , IL1 $\beta$  and IFN $\gamma$  and NO generating NOS2 enzyme, but made no attempt to up-regulate anti-  
344 inflammatory mediators such as IL-10 and SERPINS resulting in lower bacterial loads but persistent  
345 inflammation. In fact, elevated inflammation in the elderly has been previously associated with  
346 enhanced mortality (Giovannini *et al.*, 2011; de Gonzalo-Calvo *et al.*, 2012) and reduced survival after  
347 pneumococcal infection (Yende *et al.*, 2013). Contrastingly, young mice elicited a concomitant anti-  
348 inflammatory response but these together with a reduced anti-bacterial nitrosative response favored

349 bacterial survival and proliferation. Overall, this suggests that mortality of young mice maybe a result  
350 of bacterial infection but that of old mice maybe a result of its own inflammatory response and not due  
351 to the bacterial loads *per se*.

352 Apart from affecting survival after infection, chronic inflammation also increases the severity of age  
353 associated co-morbidities. Hence, several anti-inflammatory compounds are being administered  
354 (Walker and Lue, 2007; van Walsem *et al.*, 2015) and other compounds re-purposed under the broad  
355 category of Senotherapeutics to reverse the deleterious effects of inflammation. However, we show  
356 that common FDA approved anti-inflammatory drugs like Naproxen, Diclofenac and Budesonide  
357 which maybe recommended also enhanced bacterial survival. Therefore, from an infection perspective,  
358 although these drugs may help to decrease levels of pro-inflammatory factors, they are likely to  
359 parallelly create conducive conditions for bacterial survival and proliferation by interfering with innate  
360 cellular immune responses like NO production.

361 In summary (Fig 6F), we demonstrate that several innate anti-microbial factors are elevated in  
362 senescent epithelial cells and old mice. The result of these changes is an overall reduced bacterial  
363 burden upon infection both *in vitro* and *in vivo* and highlights an alternate advantage of senescent cell  
364 accumulation in the elderly who are witnessing a simultaneous decline in adaptive immunity. Further,  
365 therapies recommended to treat co-morbidities in the elderly may compromise these factors, thereby  
366 increasing susceptibility of the elderly to infection.

367

## 368 **Materials and Methods**

369 **Cell culture and induction of senescence.** HeLa, HepG2 and A549 (ATCC, USA) were maintained  
370 in DMEM (Sigma Aldrich, USA) supplemented with 10% FBS (Invitrogen). Senescence was induced  
371 by treating cells with 100  $\mu$ M 5-Bromo-2'-deoxyuridine (Sigma Aldrich, USA) for 48 hours. HepG2



372 cells were a kind gift from Prof. Saumitra Das, Department of Microbiology and Cell Biology, IISc,  
373 Bangalore.

374 **Bacterial infections in cells.** For *Salmonella* infections, the *S. Typhimurium* NCTC 12023 strain was  
375 used. An overnight culture prepared from a single isolated colony of *S. Typhimurium* grown on  
376 a *Salmonella-Shigella* (SS) agar plate was diluted 1:200 in LB and grown for 6 h at 37°C and 180 rpm  
377 to obtain a log-phase culture (OD<sub>600</sub> 1.0). The bacterial culture was then washed and resuspended in  
378 sterile phosphate-buffered saline (PBS) and used for infection.

379 To quantify bacterial infection, a monolayer of non-senescent or senescent HeLa/HepG2 cells was  
380 infected at MOI 1:10 for 60 minutes (or for 30 minutes to quantify invasion differences) at 37°C in a  
381 5% CO<sub>2</sub> humidified atmosphere (invasion). Immediately after addition of bacteria, cells were  
382 centrifuged at 250×g for 10 minutes at room temperature (RT) to allow synchronous invasion of cells.  
383 At the end of co-incubation, the medium was replaced with fresh complete medium containing 100  
384 µg/mL Gentamicin for 30 minutes to kill extracellular bacteria. Cells were then lysed in 0.5% Triton  
385 X-100 (v/v in PBS) to enumerate the number of bacteria that have invaded or maintained in medium  
386 supplemented with 10 µg/ml gentamicin until further time points at which they were lysed to determine  
387 intracellular bacterial survival and proliferation after invasion. Dilutions of the lysates were plated on  
388 SS agar to enumerate bacterial CFU.

389 For imaging, infections were carried out as mentioned above but using mCherry expressing *S.*  
390 typhimurium 12023. At 16 hours post invasion, the cells were fixed with 4% paraformaldehyde and  
391 imaged using an Olympus IX83 inverted fluorescence microscope.

392 To quantify the percentages of cytosolic *Salmonella*, a Chloroquine (CHQ) resistance assay was  
393 performed as previously described by Knodler *et al* (Knodler, Nair and Steele-mortimer, 2014).  
394 Briefly, cells were infected as mentioned above and 1h prior to lysis, CHQ at a concentration of 400µM  
395 was added to the gentamicin containing medium, to determine CHQ resistant and hence cytosolic

396 bacteria. Two other wells were simultaneously maintained without CHQ (total bacteria). Cells were  
397 then washed, lysed and dilutions of the lysates were plated on SS agar. Percent cytosolic bacteria was  
398 calculated as (bacterial CFU after CHQ treatment/bacterial CFU without CHQ treatment) \*100.

399 To study infection in the presence of molecular inhibitors or drugs, the cells were pre-treated with  
400 compound for 4 hours prior to infection and the compounds were maintained in the medium during  
401 infection till cells were used for further analysis. Aminoguanidine hemisulfate salt (AMG) (Sigma  
402 Aldrich, USA), N-acetyl-L-Cysteine (Sigma Aldrich, USA), p38 MAPK inhibitor SB 202190  
403 (Cayman Chemical Co., USA), Diclofenac (Cayman Chemical Co., USA), Budesonide (Cayman  
404 Chemical Co., USA), Naproxen (Cayman Chemical Co., USA) and Ibuprofen (Cayman Chemical Co.,  
405 USA) were used at a concentration of 10 $\mu$ M unless specified otherwise.

406 For *Mycobacterium tuberculosis* infections, an actively growing culture of virulent strain  
407 *Mycobacterium tuberculosis* H37Rv in 7H9 broth supplemented with 10% OADC was used to infect  
408 a monolayer of non-senescent or senescent A549 cells at MOI 1:10 for 4 h at 37°C in a 5% CO<sub>2</sub>  
409 humidified atmosphere. The cells were then washed with PBS, to remove extracellular bacteria and  
410 lysed in 0.5% Triton X-100 (v/v in PBS) or maintained in complete medium until further analysis.  
411 CFU was determined by plating the lysate on 7H11 plates supplemented with 10% OADC.

412 **Animal infections.** Young (2 months) and old (18 months) male, BALB/c mice were obtained from  
413 Government establishment. For *Salmonella* infections, the mice were orally gavaged with 10<sup>8</sup> bacteria  
414 resuspend in 200 $\mu$ L of PBS. At 4 days post infection, the mice were sacrificed, and the liver and spleen  
415 were harvested for CFU determination, gene expression and histological analysis.

416 For *Mycobacterium tuberculosis* infections, the mice were aerosolized with 500 CFUs of Mtb H37Rv  
417 and maintained in securely commissioned BSL3 facility for 60 days. The animals were then  
418 euthanized, and lungs were harvested for CFU determination and histological analysis.

419 **Ethics statement.** The experiments were performed in agreement with the Control and Supervision  
420 Rules, 1998 of Ministry of Environment and Forest Act, and the Institutional Animal Ethics Committee  
421 and experimental protocols were approved by the Committee for Purpose and Control and Supervision  
422 of Experiments on Animals (permit number CAF/Ethics/588/2018).

423 **Lipofuscin staining.** Lipofuscin staining was essentially done as described by Georgakopoulou *et al*  
424 (Ea *et al.*, 2013). Cells seeded on coverslips were fixed in 4% PFA and followed by incubation in 70%  
425 ethanol for 2 min. Coverslips were then inverted on a slide containing a drop of Sudan Black B solution  
426 (0.7 gram dissolved in 100mL 70% ethanol). Excess stain was washed away using 50% ethanol  
427 followed by distilled water and cells were then counterstained with 0.1% Eosin.

428 **Gene expression analysis.** Total cellular RNA was isolated using TRI reagent (Sigma, USA) and  
429 cDNA was synthesised using iScript cDNA Synthesis Kit (Bio-Rad, USA) followed by quantitative  
430 expression analysis using SYBR Green qPCR Kit (Thermo Fisher Scientific, USA) as per  
431 manufacturer's instructions. Expression levels of  $\beta$ -actin and HPRT were used to normalize the  
432 expression levels in cells and animal tissues respectively. RotoGene-Q real-time instrument and  
433 associated software was used for data and melting curves analysis. Primers used are mentioned in  
434 Table S1.

435 **SA- $\beta$  gal staining.** The protocol described by Dimri *et al.* was followed for SA  $\beta$ -gal staining (Dimri  
436 *et al.* 1995). Cells were washed, fixed for 15 minutes at room temperature in 0.2% glutaraldehyde  
437 (Amresco, USA) prepared in PBS and then incubated overnight at 37°C (without carbon dioxide) with  
438 freshly prepared staining solution (1mg/ml of X-gal (GoldBio Technology, USA) in 40 mM citric  
439 acid/sodium phosphate, pH 6.0, 5mM potassium ferrocyanide, 5 mM potassium ferricyanide, 150 mM  
440 NaCl and 2 mM magnesium chloride. Cells were then washed with PBS to get rid of excess stain and  
441 imaged using an inverted IX81 microscope, equipped with DP72 colour CCD camera (Olympus,  
442 Japan).

443 **Western blotting.** Cell lysates were prepared in ProteoJET Mammalian Cell Lysis Reagent  
444 (Fermentas Inc., USA) as per manufacturer's specifications. 60-100µg of total protein was used for  
445 analysis. All the primary antibodies were from CST (Cell Signalling Technology Inc., USA) and used  
446 at 1:1000 dilution overnight at 4°C for probing protein levels viz. phospho-Hsp27 (Cat No. 9709),  
447 Hsp27 (Cat No. 95357) GAPDH (Cat No. 2118) and phospho-Chk2 (Cat no. 2197). The developed  
448 blots were imaged and analysed using ChemiDoc MP Imaging system (Bio-Rad Inc., USA) at multiple  
449 exposure settings.

450 **ROS estimation.** Cells were incubated with 10 µM 2',7'-dichlorofluorescein (DCFDA) (Sigma, USA)  
451 in PBS for 30 min in dark, washed and analysed to detect DCF fluorescence (Infinite F200, Tecan,  
452 Austria) at an excitation wavelength of 492 nm and emission wavelength of 525 nm. Cells were  
453 counted to express DCFDA fluorescence per cell.

454 **NO quantitation.** Griess reagent (Sigma, USA) was used to measure nitrite as an indicator of NO,  
455 according to manufacturer's protocol. Briefly equal volumes of cell supernatant (50 µl) and Griess  
456 reagent were mixed in a 96-well flat-bottom microtiter plate and absorbances were read at 550 nm  
457 using a microtiter plate reader (Tecan, Austria). The amount of NO produced was determined using a  
458 standard curve for nitrite (1.56-100 µM NaNO<sub>2</sub>).

459 **Immune cell profiling.** Single-cell suspensions from the liver were prepared in PBS containing 1 %  
460 BSA and 4 mM EDTA. Cells were stained with a combination of the following antibodies for 30 min  
461 at 4°C in presence of Fc Block: Ly6G (clone 1A8), Ly6C (AL-21), CD11b (M1/70), CD11c (HL3),  
462 F4/80 (T45-2342), CD45 (30-F11) all purchased from BD Biosciences (San Diego, CA, USA). Live  
463 cells were identified by staining cells with propidium iodide (2µg /ml) and applying a negative gating  
464 strategy. Appropriate fluorescence-minus-one (FMO) controls were used to gate positive populations.  
465 Flow cytometry data were collected using a BD FACS Celesta and analyzed using FlowJo (Tree Star,  
466 Ashland, OR, USA).

467 **ELISA for IL-8.** Extracellular levels of IL-8 were estimated using BD OptiEIA™ Human IL8 ELISA  
468 kit (BD Biosciences, USA) as per manufacturer’s instructions. Media was collected from treated cells  
469 as indicated and cells were counted to normalize the IL-8 concentrations determined to  $10^4$  cells. It  
470 was ensured that the raw values obtained were within the dynamic range of the assay.

471 **Statistical analysis.** For cell-based experiments, biological triplicates or more were used. And for  
472 animal experiments 5 or more animals were used per group. All n’s are mentioned in the figure legends.  
473 Prism software (GraphPad Prism 6.0) was used for the generation of graphs and analysis. For all  
474 experiments, results are represented as mean  $\pm$  SEM. For statistical analysis, the Mann–Whitney test  
475 was used for the comparison of medians from two groups or One-way ANOVA followed by post-hoc  
476 Tukey test for comparison of multiple groups. Significance (p value) is represented as \*, where  $* \leq 0.05$ ,  
477  $** \leq 0.01$ ,  $*** \leq 0.001$ , and  $**** \leq 0.001$  and ns, where  $> 0.05$  for “not significant”.

478

#### 479 **Acknowledgments**

480 We are grateful to Prof. Dipankar Nandi for his suggestions and inputs and Central Animal Facility  
481 (CAF), IISc for the animal work. We also acknowledge Dr. V. Ravikumar (RV Metropolis, Bangalore)  
482 who assisted in histopathological analysis.

#### 483 **Competing interests**

484 No competing interests declared.

#### 485 **Funding**

486 This work was supported by funding received from the Infosys Foundation to IISc; Department of  
487 Biotechnology, India (Grant No. BT/PR12121/BRB/10/1332/2014) to DKS. The study is also  
488 supported in part by the DBT partnership program to Indian Institute of Science (DBT/PR27952-

489 INF/22/212/2018). Equipment support by DST– Funds for Infrastructure in Science and Technology  
490 program (SR/FST/LSII-036/2016).

#### 491 **Data availability**

492 The data that support the findings of this study are available from the corresponding author upon  
493 reasonable request.

494

#### 495 **References**

496 Aguilar, C. *et al.* (2020) ‘Functional screenings reveal different requirements for host microRNAs in  
497 Salmonella and Shigella infection’, *Nature Microbiology*. doi: 10.1038/s41564-019-0614-3.

498 Aktan, F. (2004) ‘iNOS-mediated nitric oxide production and its regulation’, *Life Sciences*. doi:  
499 10.1016/j.lfs.2003.10.042.

500 Alvarez, M. I. *et al.* (2017) ‘Human genetic variation in VAC14 regulates Salmonella invasion and  
501 typhoid fever through modulation of cholesterol’, *PNAS*. doi: 10.1073/pnas.1706070114.

502 Baker, D. J. *et al.* (2011) ‘Clearance of p16 Ink4a-positive senescent cells delays ageing-associated  
503 disorders’, *Nature*. Nature Publishing Group, 479(7372), pp. 232–236. doi: 10.1038/nature10600.

504 Ben-Porath, I. and Weinberg, R. A. (2005) ‘The signals and pathways activating cellular  
505 senescence’, *International Journal of Biochemistry and Cell Biology*, 37(5 SPEC. ISS.), pp. 961–  
506 976. doi: 10.1016/j.biocel.2004.10.013.

507 Bhat, N. R. *et al.* (2002) ‘p38 MAPK-mediated Transcriptional Activation of Inducible Nitric-oxide  
508 Synthase in Glial Cells’, *The Journal of biological chemistry*, 277(33), pp. 29584–29592. doi:  
509 10.1074/jbc.M204994200.

510 Bowden, S. D. *et al.* (2014) ‘Nutritional and Metabolic Requirements for the Infection of HeLa Cells

- 511 by Salmonella enterica Serovar Typhimurium’, *PLOS One*, 9(5). doi: 10.1371/journal.pone.0096266.
- 512 Brode, S. K. *et al.* (2017) ‘The risk of mycobacterial infections associated with inhaled corticosteroid  
513 use’, *European Respiratory Journal*, 50(3), pp. 1–10. doi: 10.1183/13993003.00037-2017.
- 514 Brumell, J. H. *et al.* (2002) ‘Disruption of the Salmonella-Containing Vacuole Leads to Increased  
515 Replication of Salmonella enterica Serovar Typhimurium in the Cytosol of Epithelial Cells’,  
516 *Infection and Immunity*, 70(6), pp. 3264–3270. doi: 10.1128/IAI.70.6.3264.
- 517 Byng-Maddick, R. and Noursadeghi, M. (2016) ‘Does tuberculosis threaten our ageing  
518 populations?’, *BMC Infectious Diseases*. *BMC Infectious Diseases*, 16(1), pp. 1–5. doi:  
519 10.1186/s12879-016-1451-0.
- 520 Campisi, J. and Deursen, J. M. Van (2016) ‘Senescent intimal foam cells are deleterious at all stages  
521 of atherosclerosis’, 354(6311), pp. 472–476.
- 522 Chen, J. H., Hales, C. N. and Ozanne, S. E. (2007) ‘DNA damage, cellular senescence and  
523 organismal ageing: Causal or correlative?’, *Nucleic Acids Research*, 35(22), pp. 7417–7428. doi:  
524 10.1093/nar/gkm681.
- 525 Chen, J. H., Ozanne, S. E. and Hales, C. N. (2007) ‘Methods of cellular senescence induction using  
526 oxidative stress’, *Methods in Molecular Biology*. doi: 10.1385/1-59745-361-7:179.
- 527 Childs, B. G. *et al.* (2017) ‘Senescent cells: An emerging target for diseases of ageing’, *Nature*  
528 *Reviews Drug Discovery*, 16(10), pp. 718–735. doi: 10.1038/nrd.2017.116.
- 529 Choi, Y. J. *et al.* (2019) ‘SERPINB1-mediated checkpoint of inflammatory caspase activation’,  
530 *Nature Immunology*, 20(3), pp. 276–287. doi: 10.1038/s41590-018-0303-z.SERPINB1-mediated.
- 531 Cooper, A. M. *et al.* (1995) ‘Old Mice Are Able To Control Low-Dose Aerogenic Infections with  
532 Mycobacterium tuberculosis’, *Infection and Immunity*, 63(9), pp. 3259–3265.

- 533 Coppé, J.-P. *et al.* (2010) ‘The Senescence-Associated Secretory Phenotype: The Dark Side of  
534 Tumor Suppression’, *Annual Review of Pathology: Mechanisms of Disease*. doi: 10.1146/annurev-  
535 pathol-121808-102144.
- 536 Crofford, L. J. (2013) ‘Use of NSAIDs in treating patients with arthritis’, *Arthritis Research and*  
537 *Therapy*, 15(SUPPL 3). doi: 10.1186/ar4174.
- 538 Cuenda, A. and Rousseau, S. (2007) ‘p38 MAP-Kinases pathway regulation , function and role in  
539 human diseases’, *BBA*, 1773, pp. 1358–1375. doi: 10.1016/j.bbamcr.2007.03.010.
- 540 Dimri, G. P. *et al.* (1995) ‘A biomarker that identifies senescent human cells in culture and in aging  
541 skin in vivo’, *Proc. Natl. Acad. Sci. USA*, 92(September), pp. 9363–9367.
- 542 Ea, G. *et al.* (2013) ‘Specific lipofuscin staining as a novel biomarker to detect replicative and stress  
543 - induced senescence . A method applicable in cryo - preserved and archival tissues’, *Aging Cell*,  
544 5(1), pp. 37–50.
- 545 Eckmann, L., Kagnoff, M. F. and Fierer, J. (1993) ‘Epithelial cells secrete the chemokine  
546 interleukin-8 in response to bacterial entry’, *Infection and Immunity*. doi: 10.1128/iai.61.11.4569-  
547 4574.1993.
- 548 Esposito, A. L. and Pennington, J. E. (1983) ‘Effects of Aging on Antibacterial Mechanisms in  
549 Experimental Pneumonia’, *American Review for Respiratory Diseases*, 128, pp. 662–667.
- 550 Flatt, T. (2012) ‘A new definition of aging?’, *Frontiers in Genetics*, 3(AUG), pp. 1–2. doi:  
551 10.3389/fgene.2012.00148.
- 552 Freund, A., Patil, C. K. and Campisi, J. (2011) ‘p38MAPK is a novel DNA damageresponse-  
553 independent regulator of thesenescence-associated secretory phenotype’, *The EMBO Journal*. Nature  
554 Publishing Group, 30(8), pp. 1536–1548. doi: 10.1038/emboj.2011.69.



- 555 Giovannini, S. *et al.* (2011) ‘Interleukin-6, C-reactive protein, and tumor necrosis factor-alpha as  
556 predictors of mortality in frail, community-living elderly individuals’, *Journal of the American*  
557 *Geriatrics Society*. doi: 10.1111/j.1532-5415.2011.03570.x.
- 558 Gogoi, M., Shreenivas, M. M. and Chakravorty, D. (2019) ‘Hoodwinking the Big-Eater to Prosper:  
559 The Salmonella -Macrophage Paradigm’, *Journal of Innate Immunity*. doi: 10.1159/000490953.
- 560 de Gonzalo-Calvo, D. *et al.* (2012) ‘Chronic inflammation as predictor of 1-year hospitalization and  
561 mortality in elderly population’, *European Journal of Clinical Investigation*. doi: 10.1111/j.1365-  
562 2362.2012.02689.x.
- 563 Hannemann, S., Gao, B. and Gala, J. E. (2013) ‘Salmonella Modulation of Host Cell Gene  
564 Expression Promotes Its Intracellular Growth’, *PLoS Pathogens*, 9(10). doi:  
565 10.1371/journal.ppat.1003668.
- 566 Hayflick, L. (1965) ‘The limited in vitro lifetime of human diploid cell strains’, *Experimental Cell*  
567 *Research*, 37(3), pp. 614–636. doi: 10.1016/0014-4827(65)90211-9.
- 568 Hayflick, L. and Moorhead, P. S. (1961) ‘The serial cultivation of human diploid cell strains’,  
569 *Experimental Cell Research*, 25(3), pp. 585–621. doi: 10.1016/0014-4827(61)90192-6.
- 570 Henard, C. A. and Vázquez-Torres, A. (2011) ‘Nitric oxide and salmonella pathogenesis’, *Frontiers*  
571 *in Microbiology*. doi: 10.3389/fmicb.2011.00084.
- 572 Hernandez-segura, A., Nehme, J. and Demaria, M. (2018) ‘Hallmarks of Cellular Senescence’,  
573 *Trends in Cell Biology*. Elsevier Ltd, 28(6), pp. 436–453. doi: 10.1016/j.tcb.2018.02.001.
- 574 Jeon, O. H. *et al.* (2017) ‘Local clearance of senescent cells attenuates the development of post-  
575 traumatic osteoarthritis and creates a pro-regenerative environment’, *Nature Publishing Group*.  
576 Nature Publishing Group, 23(6), pp. 775–781. doi: 10.1038/nm.4324.

- 577 Jeyapalan, J. C. *et al.* (2007) ‘Accumulation of senescent cells in mitotic tissue of aging primates’,  
578 *Mechanisms of Ageing and Development*. doi: 10.1016/j.mad.2006.11.008.
- 579 Kaner, Z. *et al.* (2019) ‘S-Nitrosylation of  $\alpha$  1-Antitrypsin Triggers Macrophages Toward  
580 Inflammatory Phenotype and Enhances Intra-Cellular Bacteria Elimination’, *Frontiers in*  
581 *Immunology*, 10(April), pp. 1–11. doi: 10.3389/fimmu.2019.00590.
- 582 Knodler, L. A., Nair, V. and Steele-mortimer, O. (2014) ‘Quantitative Assessment of Cytosolic  
583 Salmonella in Epithelial Cells’, *PLOS One*, 9(1). doi: 10.1371/journal.pone.0084681.
- 584 Krausgruber, T. *et al.* (2020) ‘Structural cells are key regulators of organ-specific immune  
585 responses’, *Nature*. doi: 10.1038/s41586-020-2424-4.
- 586 Law, R. H. P. *et al.* (2006) ‘An overview of the serpin superfamily’, *Genome Biology*, 1, pp. 1–11.  
587 doi: 10.1186/gb-2006-7-5-216.
- 588 Lim, J. S. *et al.* (2010) ‘Caveolae-mediated entry of Salmonella typhimurium into senescent  
589 nonphagocytotic host cells’, *Aging Cell*, 9(2), pp. 243–251. doi: 10.1111/j.1474-9726.2010.00554.x.
- 590 Masterson, J. C. and Dea, S. O. (2007) ‘5-Bromo-2-deoxyuridine activates DNA damage signalling  
591 responses and induces a senescence-like phenotype in p16-null lung cancer cells’, *Anti Cancer*  
592 *Drugs*, 18, pp. 1053–1068.
- 593 McCormick, B. A. *et al.* (1993) ‘Salmonella typhimurium attachment to human intestinal epithelial  
594 monolayers: Transcellular signalling to subepithelial neutrophils’, *Journal of Cell Biology*. doi:  
595 10.1083/jcb.123.4.895.
- 596 Nair, R. R., Bagheri, M. and Saini, D. K. (2014) ‘Temporally distinct roles of ATM and ROS in  
597 genotoxic stress dependent induction and maintenance of cellular senescence.’, *Journal of cell*  
598 *science*, 128(November), pp. 342–353. doi: 10.1242/jcs.159517.

- 599 Nair, R. R., Madiwale, S. V and Saini, D. K. (2018) ‘Clampdown of inflammation in aging and  
600 anticancer therapies by limiting upregulation and activation of GPCR , CXCR4’, *npj Aging and*  
601 *Mechanisms of Disease*. Springer US, (December 2017), pp. 1–11. doi: 10.1038/s41514-018-0028-0.
- 602 Pacheco, S. A. *et al.* (2013) ‘Autophagic Killing Effects against Mycobacterium tuberculosis by  
603 Alveolar Macrophages from Young and Aged Rhesus Macaques’, *PLOS One*, 8(6), pp. 2–9. doi:  
604 10.1371/journal.pone.0066985.
- 605 Petrova, N. V. *et al.* (2016) ‘Small molecule compounds that induce cellular senescence’, *Aging Cell*,  
606 15(6), pp. 999–1017. doi: 10.1111/accel.12518.
- 607 Puchta, A. *et al.* (2016) ‘TNF Drives Monocyte Dysfunction with Age and Results in Impaired Anti-  
608 pneumococcal Immunity’, *PLoS Pathogens*. doi: 10.1371/journal.ppat.1005368.
- 609 Reisz, J. A. *et al.* (2014) ‘Effects of ionizing radiation on biological molecules - mechanisms of  
610 damage and emerging methods of detection’, *Antioxidants and Redox Signaling*. doi:  
611 10.1089/ars.2013.5489.
- 612 Ren, Z. *et al.* (2009) ‘Effect of age on susceptibility to Salmonella Typhimurium infection in  
613 C57BL/6 mice’, *Journal of Medical Microbiology*, 58(12), pp. 1559–1567. doi:  
614 10.1099/jmm.0.013250-0.
- 615 Rieder, F. *et al.* (2019) ‘Persistent Salmonella enterica Serovar Typhimurium Infection Induces  
616 Protease Expression During Intestinal Fibrosis’, *Inflammatory Bowel Diseases*, XX(Xx), pp. 1–15.  
617 doi: 10.1093/ibd/izz070.
- 618 Rosenberger, C. M., Gallo, R. L. and Finlay, B. B. (2004) ‘Interplay between antibacterial effectors :  
619 A macrophage antimicrobial peptide impairs intracellular Salmonella replication’, *PNAS*, 101, pp.  
620 2422–2427.

- 621 Rossiello, F. *et al.* (2014) ‘Irreparable telomeric DNA damage and persistent DDR signalling as a  
622 shared causative mechanism of cellular senescence and ageing’, *Current Opinion in Genetics and*  
623 *Development*. doi: 10.1016/j.gde.2014.06.009.
- 624 Salama, R. *et al.* (2014) ‘Cellular senescence and its effector programs’, *Genes and Development*,  
625 28(2), pp. 99–114. doi: 10.1101/gad.235184.113.
- 626 Semple, F. and Dorin, J. R. (2012) ‘ $\beta$ -Defensins: Multifunctional modulators of infection,  
627 inflammation and more?’, *Journal of Innate Immunity*. doi: 10.1159/000336619.
- 628 Shivshankar, P. *et al.* (2011) ‘Aging Cell’, *Aging Cell*, 10, pp. 798–806. doi: 10.1111/j.1474-  
629 9726.2011.00720.x.
- 630 Thorn, C. F. *et al.* (2011) ‘Doxorubicin pathways: Pharmacodynamics and adverse effects’,  
631 *Pharmacogenetics and Genomics*. doi: 10.1097/FPC.0b013e32833ffb56.
- 632 Umezawa, K. *et al.* (1997) ‘Induction of Nitric Oxide Synthesis and Xanthine Oxidase and Their  
633 Roles in the Antimicrobial Mechanism against Salmonella typhimurium Infection in Mice’, *Infection*  
634 *and Immunity*, 65(7), pp. 2932–2940.
- 635 Walker, D. and Lue, L.-F. (2007) ‘Anti-inflammatory and Immune Therapy for Alzheimers Disease:  
636 Current Status and Future Directions’, *Current Neuropharmacology*. doi:  
637 10.2174/157015907782793667.
- 638 van Walsem, A. *et al.* (2015) ‘Relative benefit-risk comparing diclofenac to other traditional non-  
639 steroidal anti-inflammatory drugs and cyclooxygenase-2 inhibitors in patients with osteoarthritis or  
640 rheumatoid arthritis: A network meta-analysis’, *Arthritis Research and Therapy*. doi:  
641 10.1186/s13075-015-0554-0.
- 642 Wang, C. *et al.* (2009) ‘DNA damage response and cellular senescence in tissues of aging mice’,

643 *Aging Cell*, 8(3), pp. 311–323. doi: 10.1111/j.1474-9726.2009.00481.x.

644 Wang, Y., Boerma, M. and Zhou, D. (2016) ‘Ionizing Radiation-Induced Endothelial Cell

645 Senescence and Cardiovascular Diseases’, *Radiation Research*. doi: 10.1667/rr14445.1.

646 Watson, K. G. and Holden, D. W. (2010) ‘Dynamics of growth and dissemination of *Salmonella* in

647 vivo’, *Cellular Microbiology*, 12(10), pp. 1389–1397. doi: 10.1111/j.1462-5822.2010.01511.x.

648 Yende, S. *et al.* (2013) ‘Epidemiology and long-term clinical and biologic risk factors for pneumonia

649 in community-dwelling older Americans analysis of three cohorts’, *Chest*. doi: 10.1378/chest.12-

650 2818.

651

## 652 **Figure legends.**

653 **Figure 1. Effect of senescence on *Salmonella* infection. A.** SA  $\beta$ -gal staining of BrdU treated HeLa

654 cells to confirm senescence. Scale bars, 100  $\mu$ m; arrows indicate cells positive for staining. **B.**

655 Comparison of *S. Typhimurium* invasion between non-senescent (NS) and senescent (S) cells. Percent

656 intracellular bacteria calculated as (CFU at 30 or 60 min/input CFU)  $\times$ 100. **C.** Comparison of

657 intracellular bacterial proliferation between NS and S cells. Equal number of host cells were infected

658 at MOI 10. After 1 h, extracellular bacteria were killed by treating with 100  $\mu$ g/ml Gentamicin for 30

659 min. Infected cells were then incubated with medium containing 10  $\mu$ g/ml Gentamicin till the time

660 points mentioned. Bacterial CFU was determined from cell lysates. **D.** Chloroquine assay to determine

661 vacuolar or cytosolic localization of bacteria. Prior to lysis for CFU determination, cells were

662 incubated with 400  $\mu$ M Chloroquine for 1h (cytosolic CFU) or without Chloroquine (total CFU). The

663 data represents mean  $\pm$  SEM from at least three independent experiments. Statistical significance of

664 differences was analysed by Mann-Whitney U test,  $*P \leq 0.05$ . For all experiments NS, non-senescent

665 and S, senescent.

666 **Figure 2. Antimicrobial defense mechanisms in senescent cells. A.** ROS levels in NS and S HeLa  
667 cells were determined using DCFDA and normalized to levels in NS cells. **B.** Lipofuscin staining using  
668 Sudan Black B. S scale bar, 100  $\mu$ m, Arrows indicate lipofuscin granules **C.** Determination of Nitric  
669 Oxide (NO) using Griess assay. **D.** *NOS2* gene expression analysis by qRT-PCR. Values were  
670 normalized to  $\beta$ -actin and then wrt NS cells to determine fold changes. **E.** ELISA for estimation of IL-  
671 8 secreted from uninfected and infected NS and S cells. **F.** Microarray data for expression levels  
672 changes in cationic antimicrobial peptides in senescent cells (Nair et al., 2015). Here LL37 is denoted  
673 as *CAMP*-Cathelicidin Antimicrobial Peptide and  $\beta$ -defensins as *DEFB* **G.** Expression analysis for  
674 LL37 and  $\beta$ -defensin 1 (*DEFB1*) by qRT-PCR. The data represents mean  $\pm$  SEM from atleast three  
675 independent experiments. Statistical significance of differences was analysed by Mann-Whitney U  
676 test, \* $P \leq 0.05$ , \*\* $P \leq 0.01$ , \*\*\* $P \leq 0.001$ . For all experiments NS, non-senescent and S, senescent;  
677 “inf” indicates infection.

678 **Figure 3. NO is the key modulator of infection and is negatively regulated by p38 MAPK in**  
679 **senescent cells. A.** Bacterial CFU at 16h post invasion in vehicle, NAC and AMG treated senescent  
680 HeLa cells. **B.** p38 MAPK inhibition decreases bacterial proliferation. Senescent HeLa cells were  
681 infected in the presence of a specific p38MAPK inhibitor, SB 202190 (SB) and bacterial CFU was  
682 determined at 16 h post invasion. **C.** Western blot of p38 activity by monitoring phosphorylation status  
683 of Hsp27, a downstream substrate of p38MAPK in infected and uninfected senescent cells, treated  
684 with vehicle or SB202190. **D.** Analysis of changes in NO levels in SB202190 treated senescent cells  
685 by Griess assay. **E.** Expression analysis of *NOS2* in senescent cells treated with SB202190 by qRT-  
686 PCR. Values are normalized to  $\beta$ -actin and then wrt vehicle treated cells to obtain fold changes. **F.**  
687 Effect of co-inhibition of iNOS by AMG and p38 by SB202190 on intracellular bacterial proliferation.  
688 The data represents mean  $\pm$  SEM from atleast three independent experiments. Statistical significance  
689 of differences was analysed by Mann-Whitney U test, \* $P \leq 0.05$ , \*\* $P \leq 0.01$ .

690 **Figure 4: Analysis of *S.Typhimurium* infection in old and young mice.** **A.** Determination of  
691 bacterial load in liver and spleen of infected mice. Young (2m old) and old (18m old) male BALB/c  
692 mice were orally gavaged with  $10^8$  bacteria and CFU in the liver and spleen was determined at 4 days  
693 post infection. **B.** H&E staining of *Salmonella* infected mouse liver at 4 days post oral infection.  
694 Magnified region indicates inflammation and necrotic regions. Scale bar, 100 $\mu$ m. **C-F.** Gene  
695 expression analysis of *Nos2*, *Tnfa*, *Ifny* and *Il1 $\beta$*  from liver tissue. Values are normalized to *Hprt*. **G.**  
696 Quantification of immune cell percentages in the liver tissue of uninfected and infected mice. 4 days  
697 post infection, mice were euthanized to evaluate the immune cell presence in the liver and compared  
698 to uninfected animals. Immune cell percentages among all cells in the single suspension were  
699 ascertained by flow cytometry. (Y-young, Y<sub>inf</sub>-Young infected, O-Old, O<sub>inf</sub>-Old infected). The data  
700 shown are from individual mice, and lines depict the mean  $\pm$  SEM. The differences between the  
701 experimental groups were analyzed for statistical significance using Mann-Whitney U test and one-  
702 way ANOVA followed by post-hoc Tukey test was performed for statistical analysis of immune cell  
703 data, \*,  $P \leq 0.05$ ; \*\*,  $P \leq 0.01$ ; \*\*\*,  $P \leq 0.001$ .

704 **Figure 5: Effect of inflammation and inflammation modulating drugs on *Salmonella* infection in**  
705 **the aged.** **A.** Kaplan Meier survival plot of young and old mice after oral infection with *Salmonella*.  
706 Mice were orally infected with  $10^8$  bacteria and survival was monitored every 12 h. Each group  
707 contained at least 10 animals. **B-E.** Gene expression of various SERPINs (B-D) and IL-10 (E) in  
708 uninfected or infected mice at Day 4 post oral infection . Values are normalized to *Hprt*. The data  
709 shown are from individual mice, and lines depict the mean  $\pm$  SEM. **F.** IL-8 levels measured in  
710 secretome of senescent HeLa cells treated with 10 $\mu$ M steroidal or NSAIDs by ELISA. **G.** Bacterial  
711 CFU at 16h post invasion in vehicle and drug treated senescent cells. **H:** Expression analysis of *NOS2*  
712 in senescent cells treated with Diclofenac, Naproxen and Budesonides by qRT-PCR. Values are  
713 normalized to  $\beta$ -actin and then wrt vehicle treated cells to obtain fold changes. The data represents

714 mean  $\pm$  SEM from atleast three independent experiments. Statistical significance of differences was  
715 analysed by Mann-Whitney U test, \*,  $P \leq 0.05$ ; \*\*,  $P \leq 0.01$ ; \*\*\*,  $P \leq 0.001$ .

716 **Figure 6: *Mycobacterium tuberculosis* infection in old and young mice. A.** *In vitro* infection of  
717 senescent and non-senescent lung epithelial A549 cells. The data represents mean  $\pm$  SEM from three  
718 independent experiments. **B.** Bacterial burden in the lungs of infected mice. Young (Y) and old (O)  
719 mice were infected with *Mycobacterium tuberculosis* (H37Rv) by aerosolization of the bacteria. At  
720 day 1 post infection, 2 mice from each group were sacrificed to ensure comparable initial bacterial  
721 load in the lungs. Subsequently, remaining infected mice were sacrificed at day 60 post infection to  
722 determine bacterial load in the lungs. The data show the values for individual mice, with error bars  
723 showing the mean  $\pm$  SEM. **C.** Lungs from infected mice showing oedema and granulomatous lesions  
724 (Arrow). **D.** H&E staining of *Mycobacterium* infected lung tissues. Arrows indicate necrotic,  
725 granulomatous lesions and congestion. **E.** Pathological scoring of lung tissue sections of infected mice  
726 based on number of granulomatous lesions, oedema and immune cell infiltration. Scale bars, 100 $\mu$ m.  
727 The statistical significance of the differences among experimental groups in all panels was analysed  
728 using Mann-Whitney U test, \* $P \leq 0.05$ . **F.** A model with the salient findings of the study.



**Figure 1.**

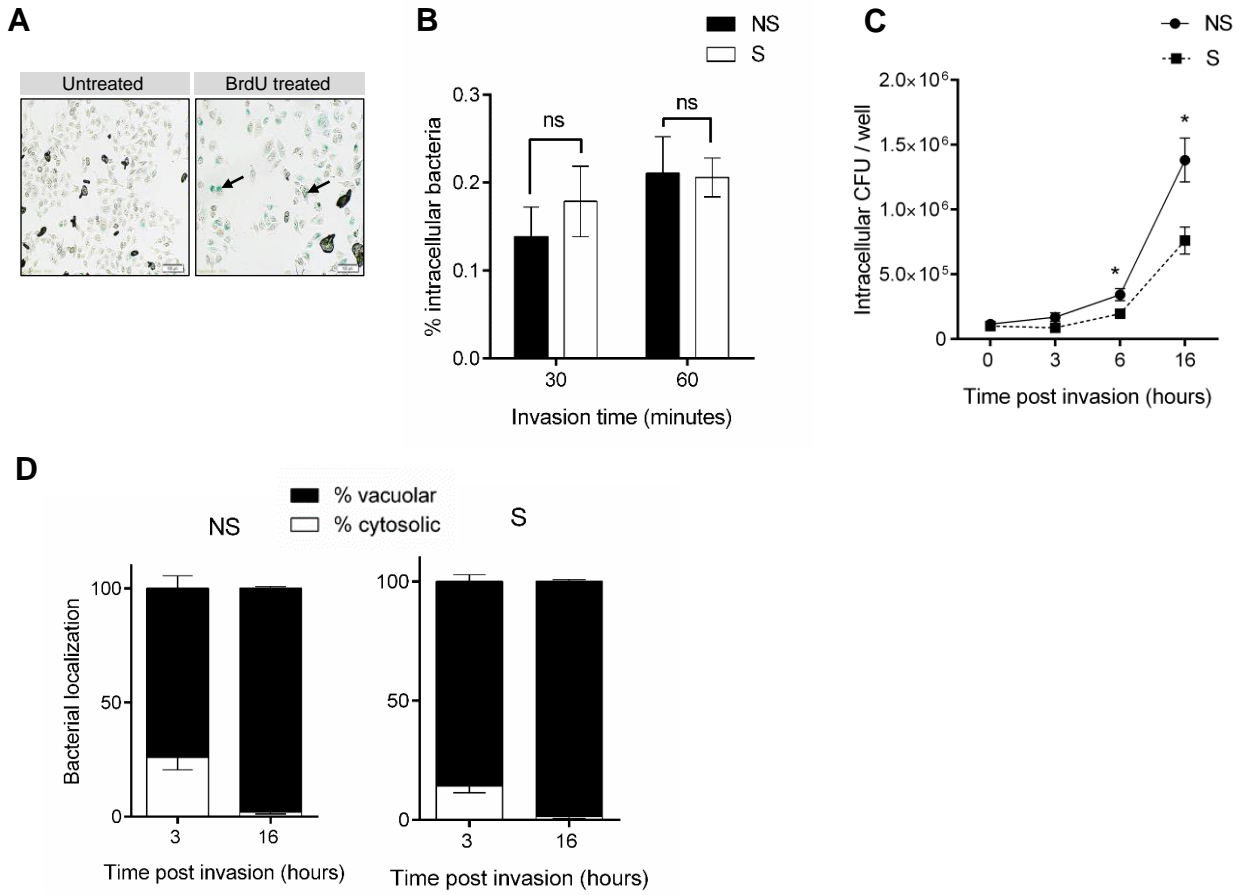

**Figure 2.**

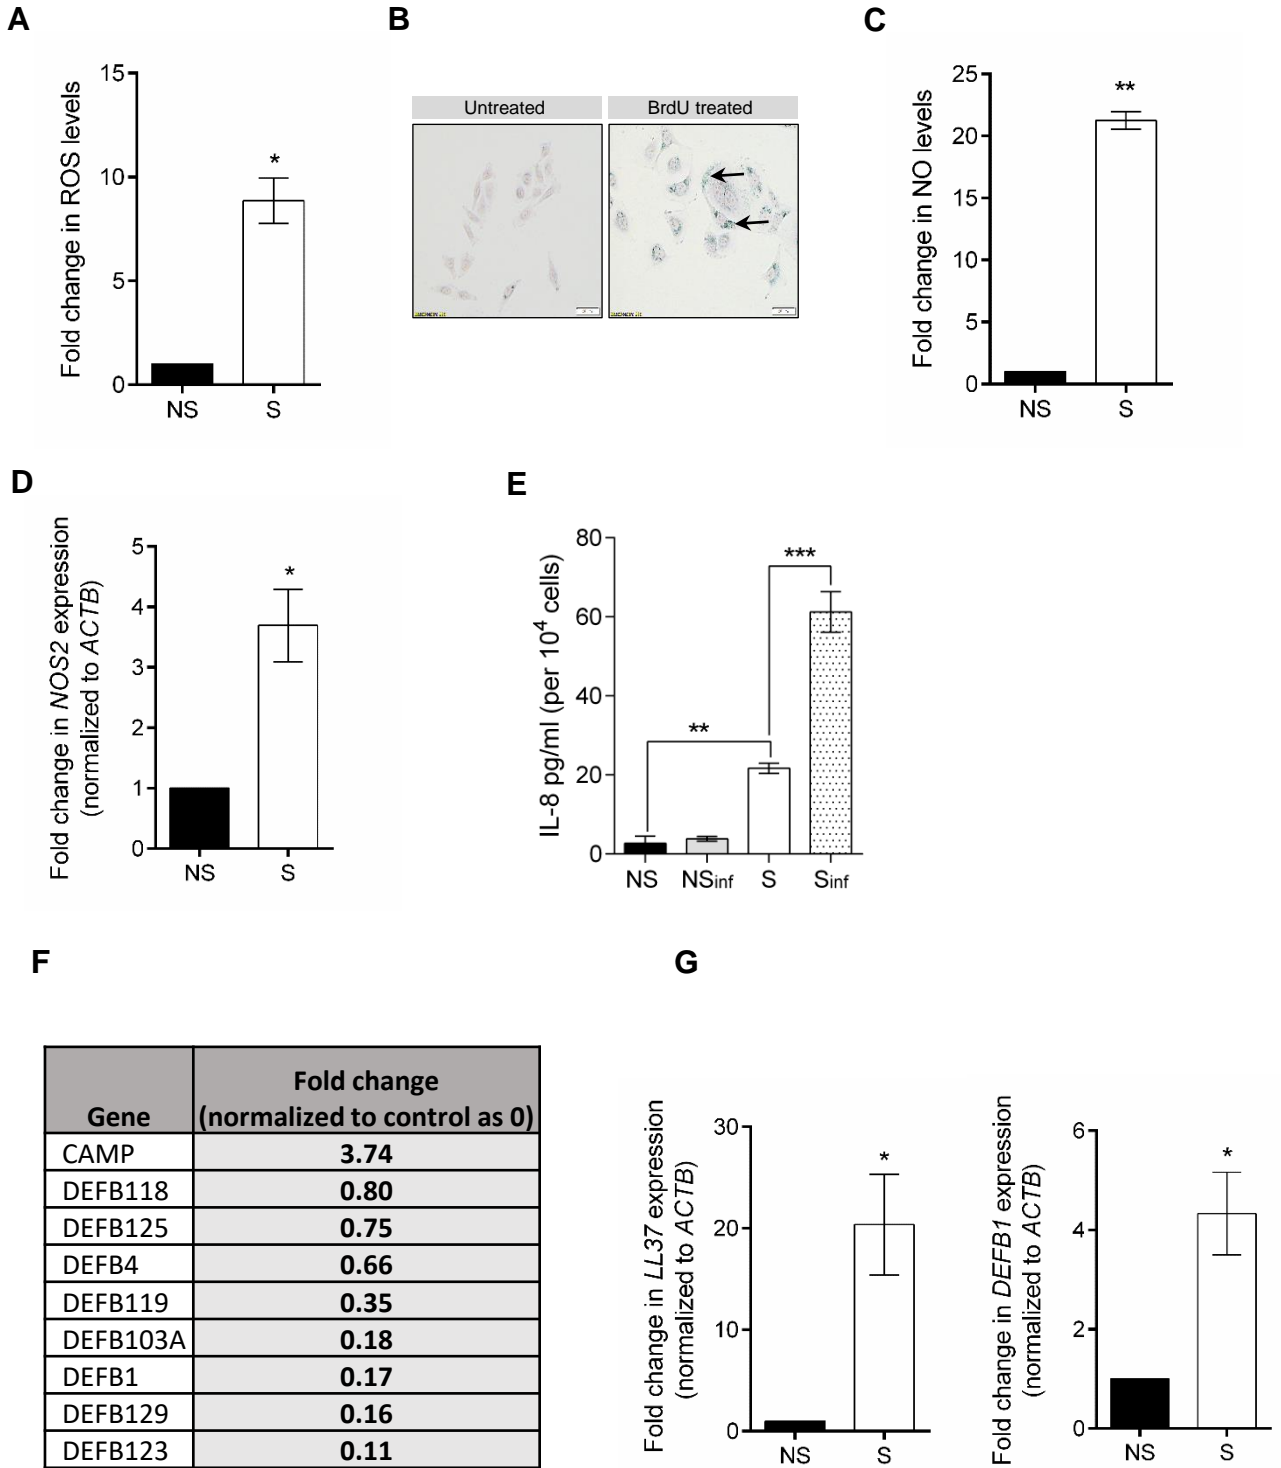

**Figure 3.**

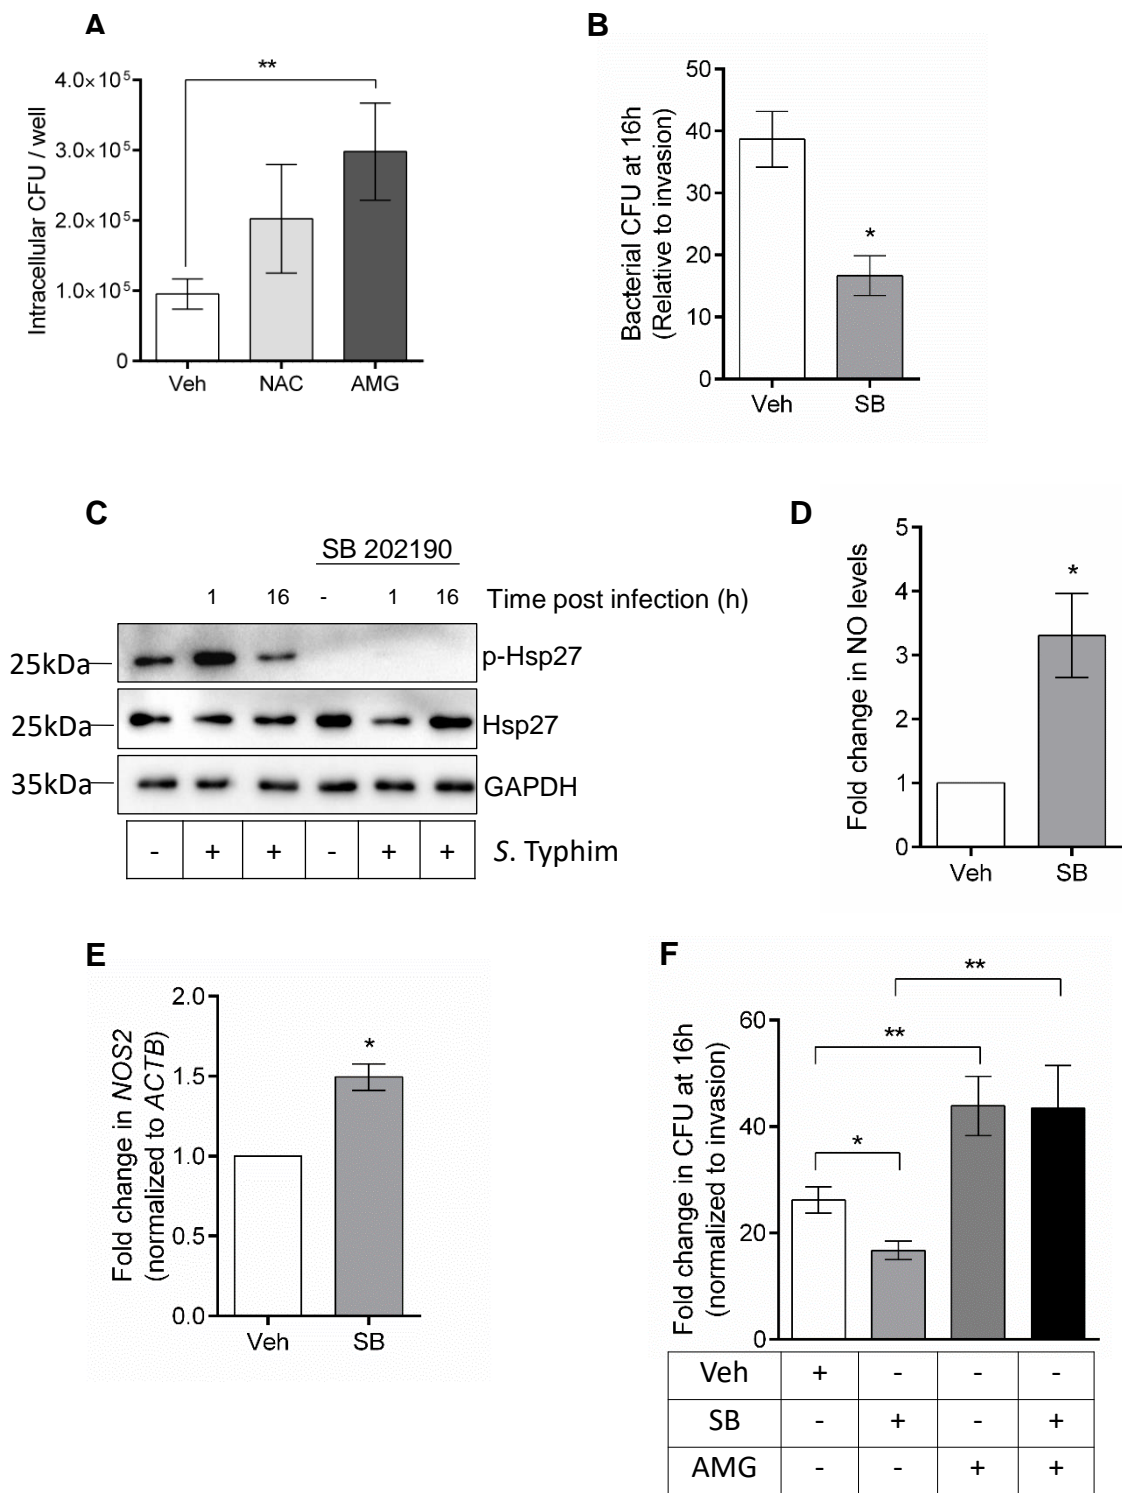

**Figure 4.**

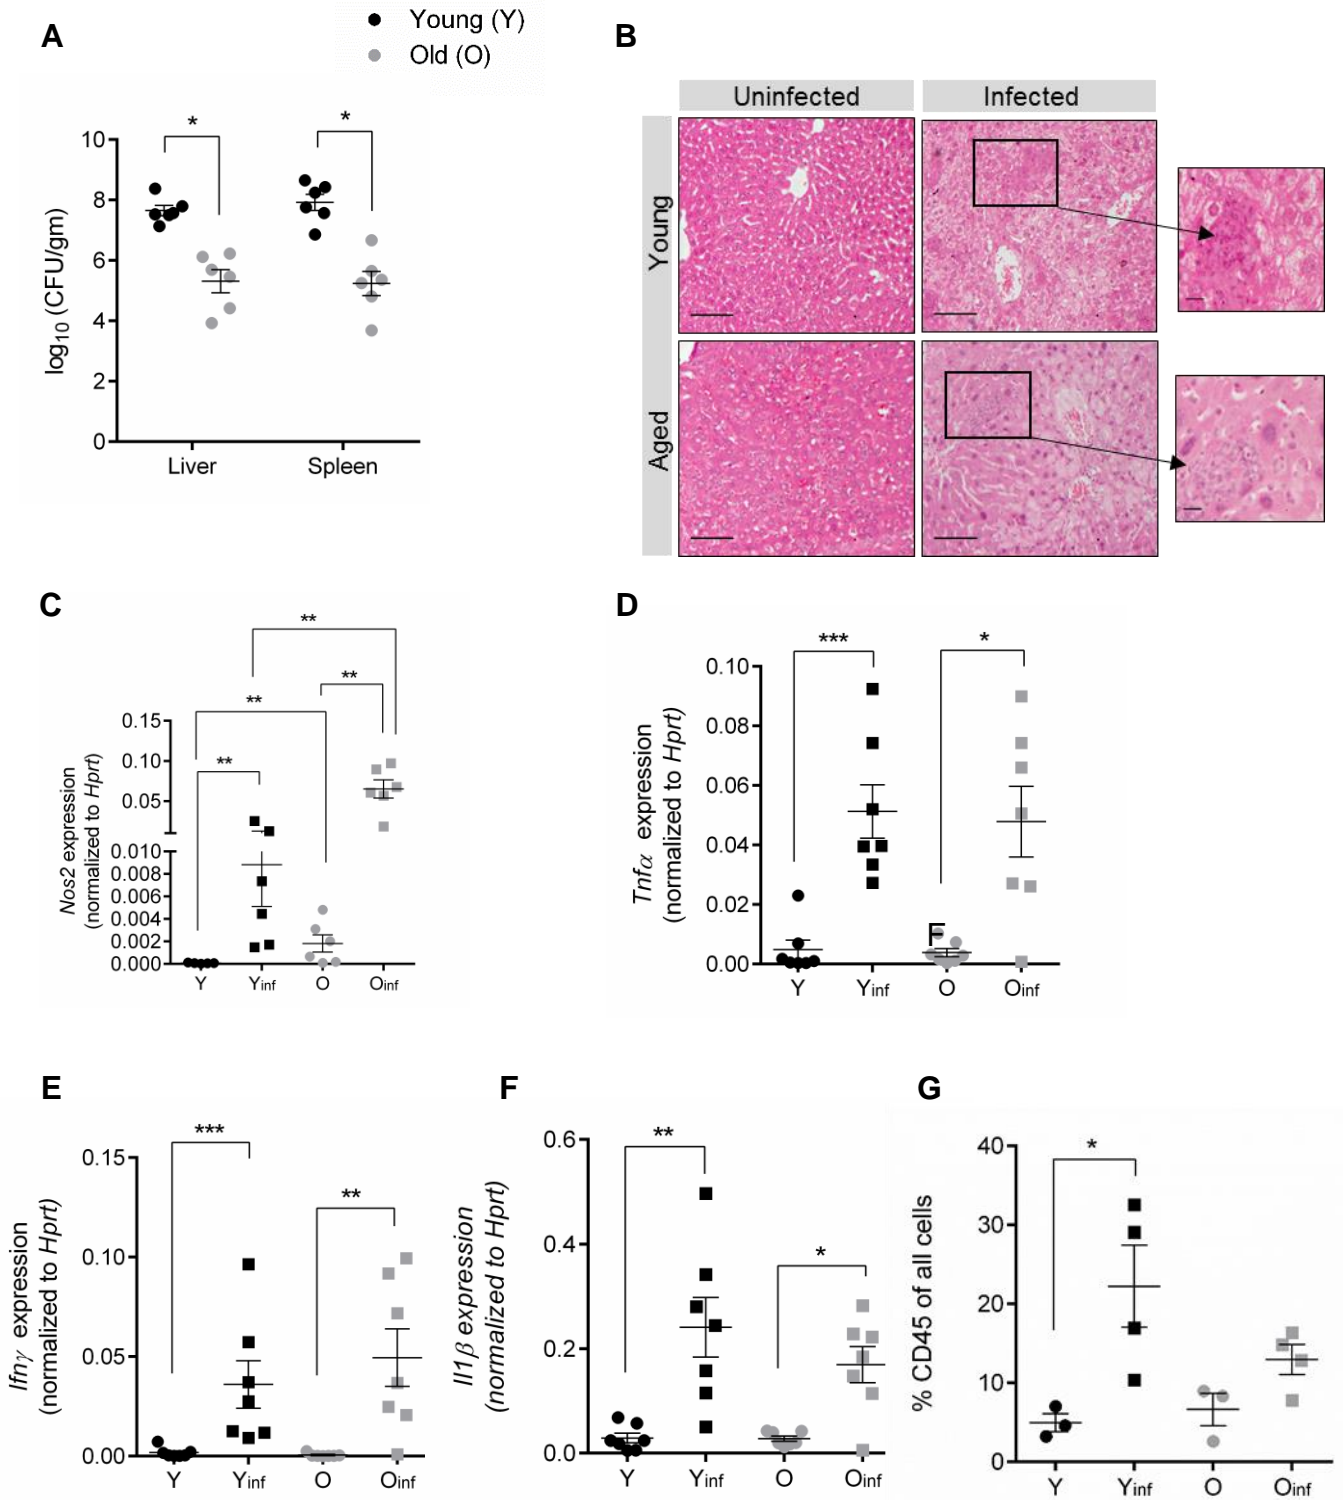

**Figure 5.**

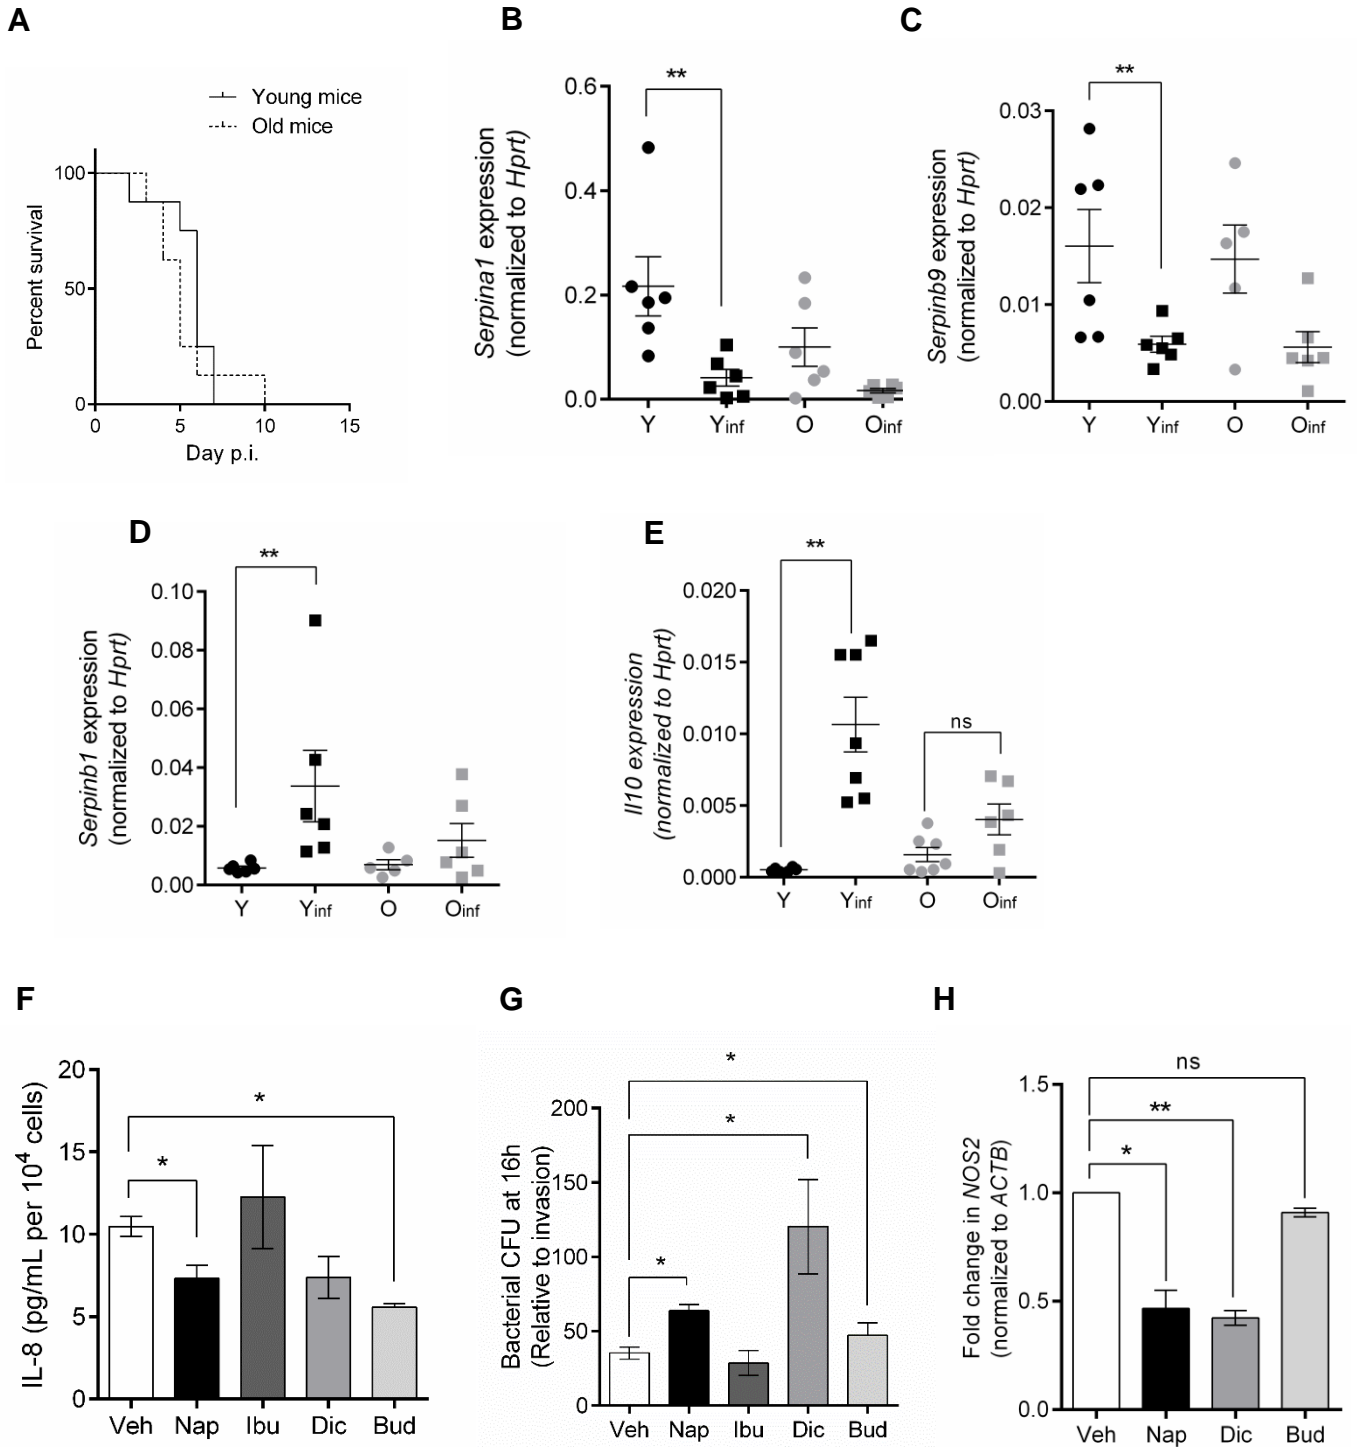

**Figure 7.**

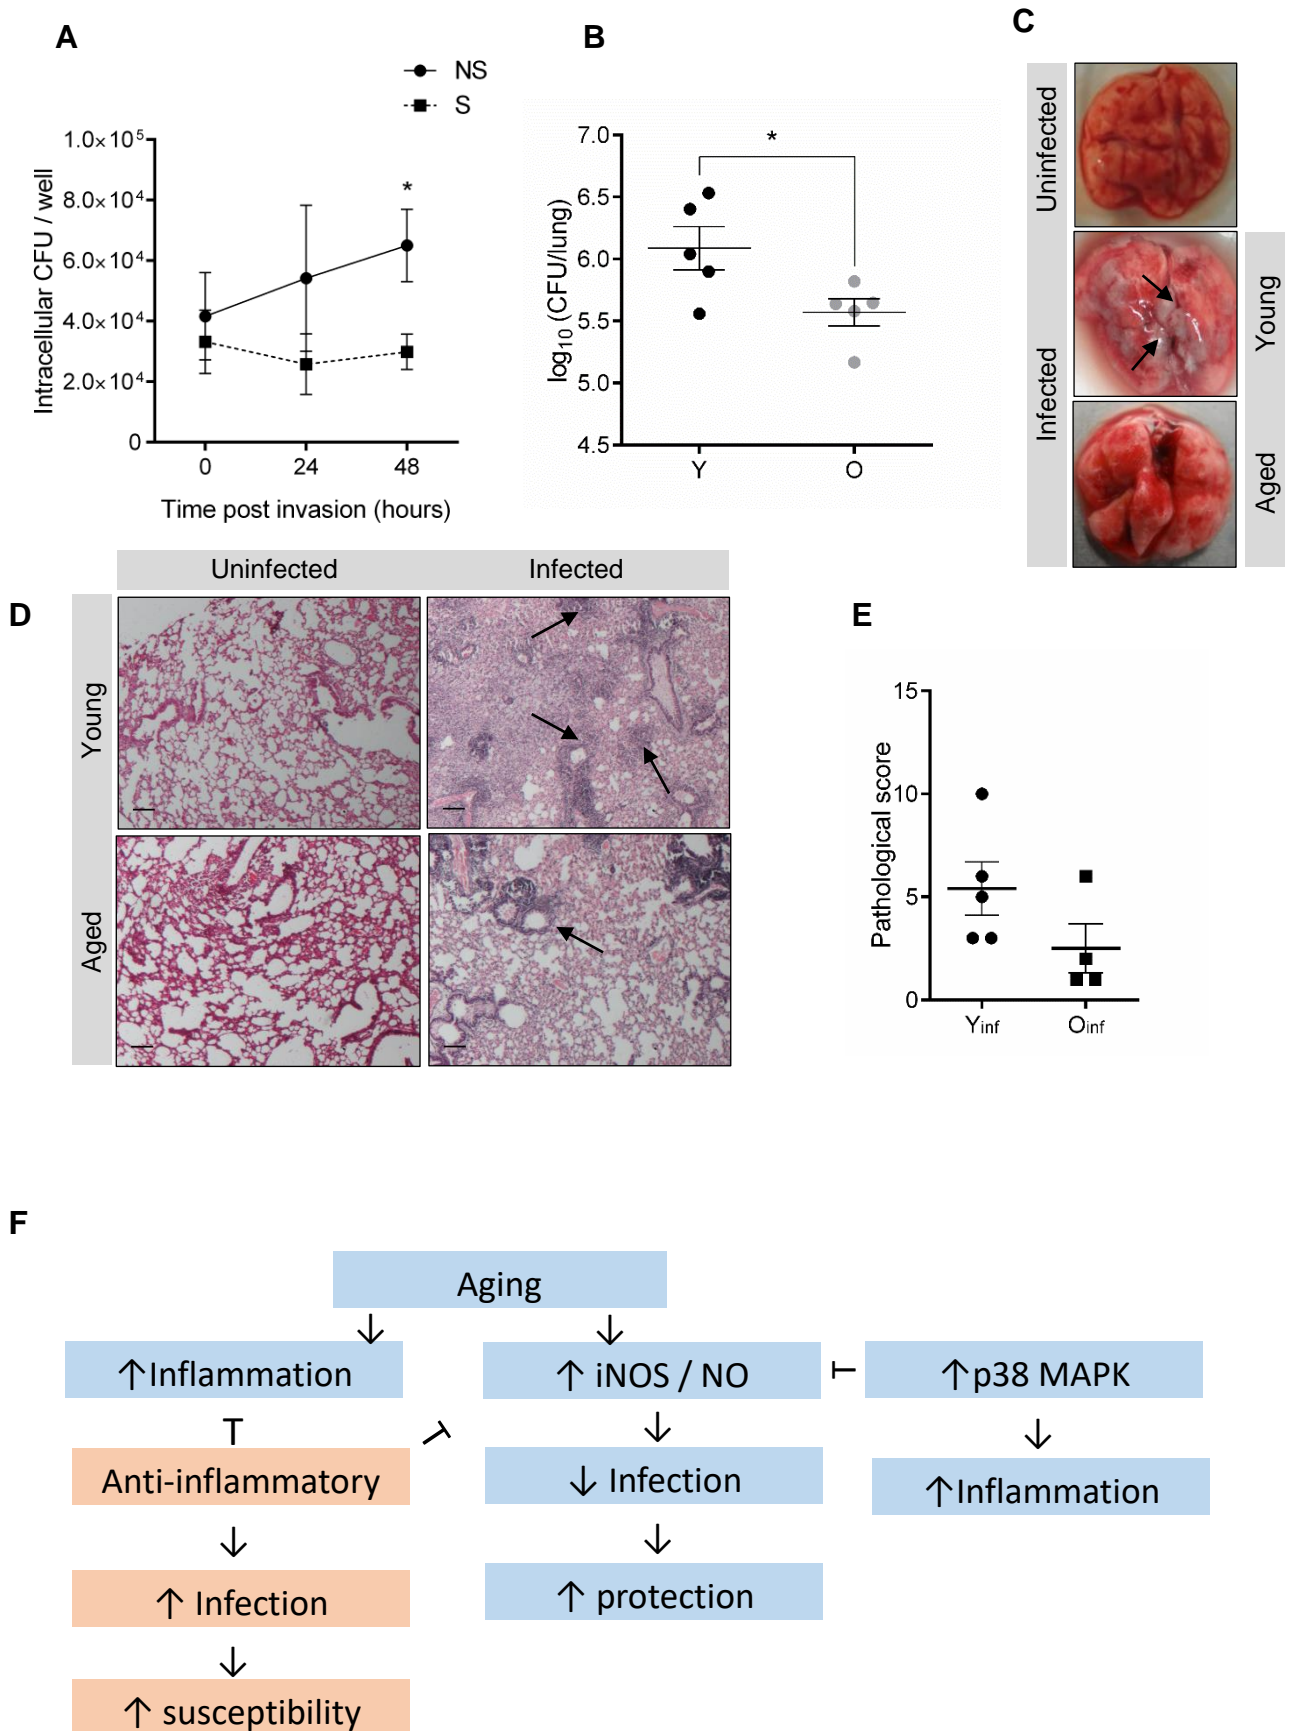

Source: https://www.biorxiv.org/content/10.1101/2020.09.15.298158v1.full.pdf
